# Supplementary material
Source: HighWire-hosted journal article supplement (https://bjsm.bmj.com/content/54/20/1208)
Supplement: inline-supplementary-material-2 [file inline-supplementary-material-2.pdf]

## Supplementary 2 (S2)

### Medline (Ovid SP) (1946-)

|    | Search Terms                                                                                                                                                                                                                                                                                                                                                                                                                                        |
|----|-----------------------------------------------------------------------------------------------------------------------------------------------------------------------------------------------------------------------------------------------------------------------------------------------------------------------------------------------------------------------------------------------------------------------------------------------------|
| 1  | Randomized Controlled Trial/                                                                                                                                                                                                                                                                                                                                                                                                                        |
| 2  | ((randomi#ed or experimental) adj3 trial).ab,ti,kw or randomi#ed controlled trial.pt                                                                                                                                                                                                                                                                                                                                                                |
| 3  | Motor Activity/ or exp sports/ or Exercise/ or Circuit-based Exercise/ or High-intensity Interval Training/ or Muscle Stretching Exercises/ or Physical Conditioning, Human/ or Plyometric Exercise/ or Resistance Training/ or Exercise Therapy/ or Healthy Lifestyle/ or Health Promotion/                                                                                                                                                        |
| 4  | ((((trial or program* or intervention?) adj4 (PA or "physical activit*" or exercis* or walk* or run* or jog* or sport* or swim* or cycl* or soccer or football or rugby or hockey or cricket or basketball or tennis or volleyball or golf or yoga)) or active living or active commuting or exercise therapy or healthy lifestyle or lifestyle change or lifestyle behavio?r or behavio?r change or health promotion or health behavio?r).ab,ti,kw |
| 5  | Program Evaluation/ or Self Report/ or "Surveys and Questionnaires"/ or Fitness Trackers/                                                                                                                                                                                                                                                                                                                                                           |
| 6  | ("outcome assessment" or evaluation? or self-report* or survey? or questionnaire? or accelerometer? or pedometer? or self-monitoring or telephone or web-based or fitness tracker? or activity tracker? or ((physical activity or exercise) adj3 (index* or level?))).ab,ti,kw                                                                                                                                                                      |
| 7  | Male/                                                                                                                                                                                                                                                                                                                                                                                                                                               |
| 8  | (men or male?).ab,ti,kw                                                                                                                                                                                                                                                                                                                                                                                                                             |
| 9  | 1 or 2                                                                                                                                                                                                                                                                                                                                                                                                                                              |
| 10 | 3 or 4                                                                                                                                                                                                                                                                                                                                                                                                                                              |
| 11 | 5 or 6                                                                                                                                                                                                                                                                                                                                                                                                                                              |
| 12 | 7 or 8                                                                                                                                                                                                                                                                                                                                                                                                                                              |
| 13 | 9 and 10 and 11 and 12                                                                                                                                                                                                                                                                                                                                                                                                                              |
| 14 | 13 limited to English and Abstract                                                                                                                                                                                                                                                                                                                                                                                                                  |
