# Supplementary material
Source: HighWire-hosted journal article supplement (https://bjsm.bmj.com/content/54/20/1208)
Supplement: inline-supplementary-material-3 [file inline-supplementary-material-3.pdf]

## Supplementary 3 (S3)

**Table S3. Brief overview of intervention and intervention focus**

| Primary source                       | Intervention overview                                                                                                                                                                                                                                                                                                                                                                                                                                                                                                                            | Theoretical orientation | Intervention engagement                                                                                                                       | Measurement instrument                    | Measure                   |
|--------------------------------------|--------------------------------------------------------------------------------------------------------------------------------------------------------------------------------------------------------------------------------------------------------------------------------------------------------------------------------------------------------------------------------------------------------------------------------------------------------------------------------------------------------------------------------------------------|-------------------------|-----------------------------------------------------------------------------------------------------------------------------------------------|-------------------------------------------|---------------------------|
| Aguiar <i>et al</i> , 2016(43)       | <ul style="list-style-type: none"> <li>- The Prevention Using Lifestyle Education (PULSE) program consisted of:               <ul style="list-style-type: none"> <li>o Intervention content from SHED-IT in Morgan <i>et al</i>. (2013)</li> <li>o Diabetes Prevention Handbook for men and PULSE Exercise Support Book for Men, including prescribed home-based exercise program, logbook, and resistance band device</li> </ul> </li> </ul>                                                                                                    | SCT                     | LOW<br>13% of men met log book compliance                                                                                                     | Pedometer                                 | Steps/day                 |
| Andersen <i>et al</i> , 2012(44, 45) | <ul style="list-style-type: none"> <li>- Structured group exercise sessions led by exercise physiologist twice a week</li> <li>- Two group lectures; individual counselling session; written material and a phone call</li> </ul>                                                                                                                                                                                                                                                                                                                | SCT                     | LOW<br>60% attendance of exercise portion<br>90% attended group lectures<br>All participants completed individual counselling and phone call. | Actigraph Accelerometer                   | Counts per minute per day |
| Ashton <i>et al</i> , 2017(46)       | <ul style="list-style-type: none"> <li>- The HEYMAN program consisted of:               <ul style="list-style-type: none"> <li>o Responsive website</li> <li>o Wearable physical activity tracker and resistance band for home-based strength training with associated app/website.</li> <li>o One-hour weekly face-to-face exercise sessions (11x group based and 1x individual) focusing on aerobic and strength exercise</li> <li>o Personalised food and nutrient report</li> <li>o Private Facebook discussion group</li> </ul> </li> </ul> | SCT<br>SDT              | MODERATE<br>100% visited website at least once, 63% visited weekly, 58% used app daily, 91% attended one 60-min face-to-face session          | Pedometer                                 | Steps/day                 |
| Galvao <i>et al</i> , 2017(47)       | <ul style="list-style-type: none"> <li>- Self-management materials and monthly telephone group (~6-8 participants) peer support for 6 months. 1/6 sessions focused on physical activity and peers discussed exercise at each session to check how men's physical activity goals were progressing</li> <li>- Participants provided with elastic exercise device and heart rate</li> </ul>                                                                                                                                                         | Nil                     | MODERATE<br>Mean attendance 4/6 (67%) sessions, 28% accessed website at least once                                                            | Godin Leisure-Time Exercise Questionnaire | Total exercise min/week   |

|                                    |                                                                                                                                                                                                                                                                                                                                                                                                                                                                                                                                                                                                               |                     |                                                          |                                                                           |                                                                                              |
|------------------------------------|---------------------------------------------------------------------------------------------------------------------------------------------------------------------------------------------------------------------------------------------------------------------------------------------------------------------------------------------------------------------------------------------------------------------------------------------------------------------------------------------------------------------------------------------------------------------------------------------------------------|---------------------|----------------------------------------------------------|---------------------------------------------------------------------------|----------------------------------------------------------------------------------------------|
|                                    | <p>monitor</p> <ul style="list-style-type: none"> <li>- Online material also available and men received feedback on unmet supportive care needs, distress score, waist circumference, and exercise levels</li> </ul>                                                                                                                                                                                                                                                                                                                                                                                          |                     |                                                          |                                                                           |                                                                                              |
| Gong <i>et al</i> , 2015(48)       | <ul style="list-style-type: none"> <li>- The KM2H program consisted of:               <ul style="list-style-type: none"> <li>o Two 45–60-minute lectures (i.e., “Secrets for Blood Pressure Control through Exercise”; “Individualised Physical Activity Counselling”)</li> <li>o Two 10–20-minute telephone counselling on obstacles to engaging in physical activity</li> <li>o Two group sessions (~8–10 participants) provide opportunities to share skills, experiences, and build social support</li> <li>o Two booster sessions post-intervention</li> </ul> </li> </ul>                               | TTM<br>MPM<br>SCapT | unknown                                                  | Self-report<br>Questionnaire<br>(non-validated survey)                    | Levels of<br>physical<br>activity                                                            |
| Gray <i>et al</i> , 2013(49)       | <ul style="list-style-type: none"> <li>- Football Fans in Training (FFIT) included twelve weekly 90-minute group (~15 men) sessions at professional football stadia.               <ul style="list-style-type: none"> <li>o Classroom-based education on topics related to weight management, healthy eating, alcohol and increasing daily physical activity</li> <li>o Coach-led physical activity sessions including training in aerobic, strength and flexibility exercises</li> </ul> </li> <li>- Pedometers to support self-monitoring as part of incremental pedometer-based walking program</li> </ul> | SCT<br>CT           | MODERATE<br>76% attended at least<br>80% of the sessions | International<br>Physical<br>Activity<br>Questionnaire<br>(Short Form)    | Total activity<br>(MET<br>min/week)                                                          |
| Groeneveld <i>et al</i> , 2011(50) | <ul style="list-style-type: none"> <li>- Health under Construction consisted of:               <ul style="list-style-type: none"> <li>o Three 45-60-minute face-to-face sessions</li> <li>o Four 15-30-minute one-on-one telephone counselling sessions, using motivational interviewing delivered by occupational physician</li> <li>o Participant’s risk profile, personal determinants, and barriers for behaviour change were discussed, and goals set. Participants chose to aim at either diet and PA, or smoking</li> </ul> </li> </ul>                                                                | Nil                 | unknown                                                  | Short<br>Questionnaire<br>to Assess<br>Health<br>enhancing PA<br>(SQUASH) | Leisure time<br>physical<br>activity and<br>spot-related<br>expenditure<br>(MET<br>min/week) |
| Hunt <i>et al</i> , 2014(51)       | <ul style="list-style-type: none"> <li>- As for FFIT in Gray <i>et al</i>. (2013)</li> </ul>                                                                                                                                                                                                                                                                                                                                                                                                                                                                                                                  | SCT<br>CT           | MODERATE<br>79% attended at least<br>6/12 sessions       | International<br>Physical<br>Activity<br>Questionnaire                    | Total activity<br>(MET<br>min/week)                                                          |

|                                        |                                                                                                                                                                                                                                                                                                                                                                                                                                                                                                                                                                                                                                                                                                                                                                                                                                                                                                                                                                     |     |                                                                                                                                    | (Short Form)                              |                           |
|----------------------------------------|---------------------------------------------------------------------------------------------------------------------------------------------------------------------------------------------------------------------------------------------------------------------------------------------------------------------------------------------------------------------------------------------------------------------------------------------------------------------------------------------------------------------------------------------------------------------------------------------------------------------------------------------------------------------------------------------------------------------------------------------------------------------------------------------------------------------------------------------------------------------------------------------------------------------------------------------------------------------|-----|------------------------------------------------------------------------------------------------------------------------------------|-------------------------------------------|---------------------------|
| Livingston <i>et al</i> , 2015(52, 53) | <ul style="list-style-type: none"> <li>- The ENGAGE intervention was a clinician-referred 12-week community exercise program consisting of:               <ul style="list-style-type: none"> <li>o Two 50-minute supervised gym sessions and one home-based session per week based on exercise guidelines for cancer survivors developed by the American College of Sports Medicine and Exercise and Sport Science Australia</li> </ul> </li> </ul>                                                                                                                                                                                                                                                                                                                                                                                                                                                                                                                 | SCT | HIGH<br>85% attended at least 18/24 gym session, of those that completed diary (74%), 81% completed 9-12 home-based weekly session | Godin Leisure-Time Exercise Questionnaire | MVPA min/week             |
| Maruyama <i>et al</i> , 2010(54)       | <ul style="list-style-type: none"> <li>- The LiSM program included:               <ul style="list-style-type: none"> <li>o Individualised assessment and collaborative goal setting sessions based on food group intake and physical activity</li> <li>o Two individual counselling sessions with a registered dietitian and physical trainer</li> <li>o Monthly website advice designed to promote healthy dietary habits and physical activity</li> <li>o Monthly individual contact with a dietitian and a physical trainer. The fourth counselling session, at end of the third month, conducted through the website</li> <li>o Personal and interactive website to self-monitor weight, food intake and physical activity, and discuss awareness of lifestyles for self-monitoring throughout the intervention period</li> <li>o Pedometer linked to website. Data automatically presented in figures on their individual website pages</li> </ul> </li> </ul> | Nil | LOW<br>Adherence to self-reporting was low (75% of intervention, 50% control returning usable records)                             | Pedometer                                 | Steps/day                 |
| McGowan <i>et al</i> , 2013(55)        | <ul style="list-style-type: none"> <li>- The PROMOTE intervention provided all participants with physical activity Guidelines for Americans (2008)</li> <li>- Self-administered implementation group:               <ul style="list-style-type: none"> <li>o Recorded current levels of physical activity, set goals and made detailed plans to meet the physical activity guidelines, or increase physical activity by 60+ min/week if already meeting guidelines. List personal physical activity barriers, and strategies to overcome barriers</li> </ul> </li> </ul>                                                                                                                                                                                                                                                                                                                                                                                            | TPB | LOW<br>46% saying they did not really complete it, 23% reporting completing some of it, 17% most of it, and 14% all of it          | Godin Leisure-Time Exercise Questionnaire | Total activity (min/week) |

|                                 |                                                                                                                                                                                                                                                                                                                                                                                                                                                                                                                                                                                                                                                                                                                                               |            |                                                                                                          |                                           |                        |
|---------------------------------|-----------------------------------------------------------------------------------------------------------------------------------------------------------------------------------------------------------------------------------------------------------------------------------------------------------------------------------------------------------------------------------------------------------------------------------------------------------------------------------------------------------------------------------------------------------------------------------------------------------------------------------------------------------------------------------------------------------------------------------------------|------------|----------------------------------------------------------------------------------------------------------|-------------------------------------------|------------------------|
|                                 | <ul style="list-style-type: none"> <li>- The telephone-assisted implementation group: <ul style="list-style-type: none"> <li>o Same as above plus a 12-minute telephone call to assist with goal setting and planning</li> </ul> </li> </ul>                                                                                                                                                                                                                                                                                                                                                                                                                                                                                                  |            |                                                                                                          |                                           |                        |
| Morgan <i>et al</i> , 2013(56)  | <ul style="list-style-type: none"> <li>- Self-help, Exercise, Diet and Information Technology (SHED-IT) weight loss program for men consisted of a resource package including DVD, gender-tailored handbook and a pedometer to monitor step count <ul style="list-style-type: none"> <li>o Two of nine evidence-based weight loss messages focused on physical activity ('Every step counts', 'Reduce sitting time'. One of the three SMART goals that men were asked to set each month was related to physical activity</li> </ul> </li> <li>- Online version included exercise diary and some exercise-related feedback</li> </ul>                                                                                                          | SCT        | unknown                                                                                                  | Pedometer                                 | Steps/day              |
| Morgan <i>et al</i> , 2014(57)  | <ul style="list-style-type: none"> <li>- Health Dads, Healthy Kids (HDHK) consisted of seven weekly group sessions (90 minutes each): <ul style="list-style-type: none"> <li>o Four sessions for fathers only, and three practical sessions for fathers and children, which included co-physical activity.</li> <li>o Weight loss component of HDHK intervention was adapted from SHED-IT program</li> </ul> </li> </ul>                                                                                                                                                                                                                                                                                                                      | SCT<br>FST | MODERATE<br>Mean attendance rate for 7 sessions was 71%                                                  | Pedometer                                 | Steps/day              |
| Morgan <i>et al</i> , 2011a(58) | <ul style="list-style-type: none"> <li>- As for HDHK in Morgan <i>et al</i> (2014)</li> </ul>                                                                                                                                                                                                                                                                                                                                                                                                                                                                                                                                                                                                                                                 | SCT<br>FST | HIGH<br>Participants attended 81% of the sessions                                                        | Pedometer                                 | Mean steps/day         |
| Morgan <i>et al</i> , 2011b(59) | <ul style="list-style-type: none"> <li>- Workplace POWER (Preventing Obesity Without Eating like a Rabbit) consisted of: <ul style="list-style-type: none"> <li>o One face-to-face information session (75 min) covering energy balance, shift work challenges to diet and physical activity, weight loss tips, and behaviour change strategies (self-monitoring, goal setting, social support)</li> <li>o Group-based financial incentives (\$AU50 voucher per person for sport store for group with highest mean weight loss at 1 month and end of program)</li> <li>o Online component (direction to publicly accessible, free weight loss website)</li> <li>o Program booklet, weight loss handbook, and pedometer</li> </ul> </li> </ul> | SCT        | LOW<br>Average of 24 exercise entries on website across 14 weeks. 28% complied with web-based components | Godin Leisure-Time Exercise Questionnaire | Total MET minutes/week |
| Morgan <i>et al</i> , 2009(60)  | <ul style="list-style-type: none"> <li>- As for SHED-IT in Morgan <i>et al</i> (2013)</li> </ul>                                                                                                                                                                                                                                                                                                                                                                                                                                                                                                                                                                                                                                              | SCT        | LOW                                                                                                      | Pedometer                                 | Mean                   |

|                                   |                                                                                                                                                                                                                                                                                                                                                                                                                                                                                                                                                               |                  |                                                                                                      |                                                           |                         |
|-----------------------------------|---------------------------------------------------------------------------------------------------------------------------------------------------------------------------------------------------------------------------------------------------------------------------------------------------------------------------------------------------------------------------------------------------------------------------------------------------------------------------------------------------------------------------------------------------------------|------------------|------------------------------------------------------------------------------------------------------|-----------------------------------------------------------|-------------------------|
|                                   |                                                                                                                                                                                                                                                                                                                                                                                                                                                                                                                                                               |                  | Average of 23 exercise entries on website throughout intervention. 41% complied with web-based tasks |                                                           | steps/day               |
| Patrick <i>et al</i> , 2011(61)   | - Internet-based intervention designed to promote weight loss through goals for diet and physical activity including increasing steps per day, and strength training consisting of: <ul style="list-style-type: none"> <li>Computerised assessment to allow tailoring of messages</li> <li>Weekly web-based learning presented in short sessions using “business-like” language and graphics</li> <li>Individualised feedback on progress</li> <li>Pedometers to self-monitor daily step count and recording of minutes of other physical activity</li> </ul> | SCT              | MODERATE<br>Average of 23.4 weekly logins                                                            | International Physical Activity Questionnaire (Long Form) | Total walking (min/day) |
| Petrella <i>et al</i> , 2017(62)  | - As for FFIT in Gray <i>et al</i> [20] and Hunt <i>et al</i> [22], except ice-hockey setting                                                                                                                                                                                                                                                                                                                                                                                                                                                                 | CT<br>SCT<br>SRT | HIGH<br>Mean session attendance of 82%                                                               | Pedometer                                                 | Mean steps/day          |
| Pritchard <i>et al</i> , 1997(63) | - Two intervention arms including weight loss through diet or through physical activity <ul style="list-style-type: none"> <li>Self-selected aerobic leisure exercise regimen, minimum 3 x weekly</li> </ul>                                                                                                                                                                                                                                                                                                                                                  | Nil              | MODERATE<br>>70% attendance at bimonthly presentations                                               | Activity Diary                                            | Index of activity       |
| Schröder <i>et al</i> , 2018(64)  | - The PREDIMED-Plus program targeted goal setting, action planning, feedback, informational materials, motivation, and self-monitoring during: <ul style="list-style-type: none"> <li>Twelve individual (60-minute) sessions</li> <li>Twelve telephone calls</li> <li>Three one-hour group sessions. Tailored physical activity goals and an action plan</li> </ul> - Participants are provided with a pedometer and a physical activity diary for self-monitoring                                                                                            | Nil              | unknown                                                                                              | Regicor Short Physical Activity Questionnaire             | MET min/day             |
| Shin <i>et al</i> , 2017(65)      | - The EPAROSFI program included: <ul style="list-style-type: none"> <li>Standardised education materials</li> <li>One-to-one education on diet and exercise from a nurse for 5 minutes each session. Contents included consequence of</li> </ul>                                                                                                                                                                                                                                                                                                              | BET              | MODERATE<br>Incentive group decreased from about 0.9 to 0.5 goals                                    | International Physical Activity Questionnaire             | Kcal/week               |

|                                 |                                                                                                                                                                                                                                                                                                                                                                                                                                                                                                                                                                                                                                                                                                                         |                           |                                                                                                               |                                                            |                     |
|---------------------------------|-------------------------------------------------------------------------------------------------------------------------------------------------------------------------------------------------------------------------------------------------------------------------------------------------------------------------------------------------------------------------------------------------------------------------------------------------------------------------------------------------------------------------------------------------------------------------------------------------------------------------------------------------------------------------------------------------------------------------|---------------------------|---------------------------------------------------------------------------------------------------------------|------------------------------------------------------------|---------------------|
|                                 | <p>obesity, dietary recommendations for weight loss, and physical activity recommendation including intensity, time, and type</p> <ul style="list-style-type: none"> <li>Fitmeter accelerometer and smartphone app to self-monitor, with or without additional financial incentives</li> </ul>                                                                                                                                                                                                                                                                                                                                                                                                                          |                           | accomplished per day.                                                                                         | (Short Form)                                               |                     |
| Viestar <i>et al</i> , 2018(66) | <ul style="list-style-type: none"> <li>The VIP in Construction program includes personal health coaching, information, tools to support changes in PA and dietary behaviour</li> <li>Two to four coaching sessions and tailored information offered during work hours including training instruction for core stability and strengthening exercises</li> <li>“VIP in construction” toolbox (overview of company health-promoting facilities, waist-measuring tape, pedometer, BMI calculator, calorie guide, recipes, and knowledge tests)</li> </ul>                                                                                                                                                                   | TPB<br>HBM<br>TTM<br>PAPM | unknown                                                                                                       | Short Questionnaire to Assess Health enhancing PA (SQUASH) | MVPA (min/week)     |
| Werkman <i>et al</i> , 2010(67) | <ul style="list-style-type: none"> <li>Five program modules over 1 year. Module 3 aimed to improve dietary and/or physical activity; participants could receive computer-tailored feedback on: physical activity, fibre, portion size. Module 1 included pedometer. Modules 4 and 5 online – participants access information on diet and physical activity behaviour.</li> </ul>                                                                                                                                                                                                                                                                                                                                        | TPB<br>TTM<br>PAPM        | MODERATE<br>82% used toolkit, 72% CD1, 41% CD2, 54% website and 16% interactive components                    | Physical Activity for the Elderly                          | Daily PA (min/week) |
| Wyke <i>et al</i> , 2019(68)    | <ul style="list-style-type: none"> <li>EuroFIT included twelve weekly 90-minute group (~15-20 men) sessions at professional football stadia. <ul style="list-style-type: none"> <li>Classroom-based education on topics related to increasing daily physical activity and reducing sedentary time and maintaining changes long-term, and healthy eating (including alcohol consumption)</li> <li>Coach-led physical activity sessions including training in aerobic, strength and flexibility exercises</li> </ul> </li> <li>Pedometers to support self-monitoring as part of incremental pedometer-based walking program; novel pocket-worn device SitFIT) to self-monitor sedentary and non-sedentary time</li> </ul> | SCT<br>CT                 | MODERATE<br>86% attended at least 6 of the 12 sessions, 54% attended 10 or more, 15% attended all 12 sessions | ActivPAL                                                   | Steps/day           |

Nil = Not identified; SCT = Social Cognitive Theory; SDT = Self Determination Theory; TTM = Transtheoretical Model; MPM = Model of Personalised Medicine; SCapT = Social Capital Theory; CT = Control theory; TPB = Theory of Planned Behaviour, FST = Family Systems Theory; SRT = Self-regulation Theory; BET = Behavioural Economic Theory; HBM = Health Belief Model; PAPM = Precaution Adoption Process Model
